# Supplementary material
Source: MDPI journal article supplement (https://www.mdpi.com/2071-1050/13/16/9095)
Supplement: s1 [file s1 › sustainability-1299015-SI.pdf]

Supplementary material

**Table S1** - UN SDGs and targets and the four links of a food supply chain

| UN SDG                                                                             | Target                                                                                                                                                                                                                                                                                                                                                                    | Farmers                             | Food processors                     | Food traders | Food consumers                      |
|------------------------------------------------------------------------------------|---------------------------------------------------------------------------------------------------------------------------------------------------------------------------------------------------------------------------------------------------------------------------------------------------------------------------------------------------------------------------|-------------------------------------|-------------------------------------|--------------|-------------------------------------|
| 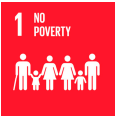  | By 2030, ensure that all men and women, in particular the poor and the vulnerable, have equal rights to economic resources, as well as access to basic services, ownership and control over land and other forms of property, inheritance, natural resources, appropriate new technology and financial services, including microfinance                                   | <input checked="" type="checkbox"/> |                                     |              |                                     |
|                                                                                    | By 2030, build the resilience of the poor and those in vulnerable situations and reduce their exposure and vulnerability to climate-related extreme events and other economic, social and environmental shocks and disasters                                                                                                                                              | <input checked="" type="checkbox"/> |                                     |              |                                     |
| 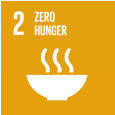 | By 2030, end hunger and ensure access by all people, in particular the poor and people in vulnerable situations, including infants, to safe, nutritious and sufficient food all year round                                                                                                                                                                                |                                     |                                     |              | <input checked="" type="checkbox"/> |
|                                                                                    | By 2030, end all forms of malnutrition, including achieving, by 2025, the internationally agreed targets on stunting and wasting in children under 5 years of age, and address the nutritional needs of adolescent girls, pregnant and lactating women and older persons                                                                                                  |                                     |                                     |              | <input checked="" type="checkbox"/> |
|                                                                                    | By 2030, double the agricultural productivity and incomes of small-scale food producers, in particular women, indigenous peoples, family farmers, pastoralists and fishers, including through secure and equal access to land, other productive resources and inputs, knowledge, financial services, markets and opportunities for value addition and non-farm employment | <input checked="" type="checkbox"/> |                                     |              |                                     |
|                                                                                    | By 2030, ensure sustainable food production systems and implement resilient agricultural practices that increase productivity and production, that help maintain ecosystems, that strengthen capacity for adaptation to climate change, extreme weather, drought, flooding and other disasters and that progressively improve land and soil quality                       |                                     | <input checked="" type="checkbox"/> |              |                                     |

| UN SDG                                                                              | Target                                                                                                                                                                                                                                                                                                                                                                                                                                                | Farmers                             | Food processors | Food traders                        | Food consumers                      |
|-------------------------------------------------------------------------------------|-------------------------------------------------------------------------------------------------------------------------------------------------------------------------------------------------------------------------------------------------------------------------------------------------------------------------------------------------------------------------------------------------------------------------------------------------------|-------------------------------------|-----------------|-------------------------------------|-------------------------------------|
| 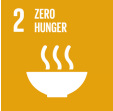   | By 2020, maintain the genetic diversity of seeds, cultivated plants and farmed and domesticated animals and their related wild species, including through soundly managed and diversified seed and plant banks at the national, regional and international levels, and promote access to and fair and equitable sharing of benefits arising from the utilization of genetic resources and associated traditional knowledge, as internationally agreed | <input checked="" type="checkbox"/> |                 |                                     |                                     |
|                                                                                     | Increase investment, including through enhanced international cooperation, in rural infrastructure, agricultural research and extension services, technology development and plant and livestock gene banks in order to enhance agricultural productive capacity in developing countries, in particular least developed countries                                                                                                                     | <input checked="" type="checkbox"/> |                 |                                     |                                     |
|                                                                                     | Correct and prevent trade restrictions and distortions in world agricultural markets, including through the parallel elimination of all forms of agricultural export subsidies and all export measures with equivalent effect, in accordance with the mandate of the Doha Development Round                                                                                                                                                           |                                     |                 | <input checked="" type="checkbox"/> |                                     |
|                                                                                     | Adopt measures to ensure the proper functioning of food commodity markets and their derivatives and facilitate timely access to market information, including on food reserves, in order to help limit extreme food price volatility                                                                                                                                                                                                                  |                                     |                 | <input checked="" type="checkbox"/> |                                     |
| 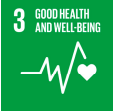  | By 2030, end the epidemics of AIDS, tuberculosis, malaria and neglected tropical diseases and combat hepatitis, <u>water-borne diseases</u> and other communicable diseases                                                                                                                                                                                                                                                                           |                                     |                 |                                     | <input checked="" type="checkbox"/> |
| 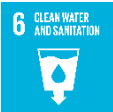 | By 2030, achieve universal and equitable access to safe and affordable drinking water for all                                                                                                                                                                                                                                                                                                                                                         |                                     |                 |                                     | <input checked="" type="checkbox"/> |
|                                                                                     | By 2030, achieve access to adequate and equitable sanitation and hygiene for all and end open defecation, paying special attention to the needs of women and girls and those in vulnerable situations                                                                                                                                                                                                                                                 |                                     |                 |                                     | <input checked="" type="checkbox"/> |
|                                                                                     | By 2030, improve water quality by reducing pollution, eliminating dumping and minimizing release of hazardous chemicals and materials, halving the proportion of untreated wastewater and substantially increasing recycling and safe reuse globally                                                                                                                                                                                                  |                                     |                 |                                     | <input checked="" type="checkbox"/> |

| UN SDG                                                                                                                              | Target                                                                                                                                                                                                                                                                                                             | Farmers                             | Food processors                     | Food traders                        | Food consumers                      |
|-------------------------------------------------------------------------------------------------------------------------------------|--------------------------------------------------------------------------------------------------------------------------------------------------------------------------------------------------------------------------------------------------------------------------------------------------------------------|-------------------------------------|-------------------------------------|-------------------------------------|-------------------------------------|
| 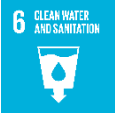 <b>6</b> CLEAN WATER AND SANITATION               | By 2030, substantially increase water-use efficiency across all sectors and ensure sustainable withdrawals and supply of freshwater to address water scarcity and substantially reduce the number of people suffering from water scarcity                                                                          |                                     | <input checked="" type="checkbox"/> |                                     |                                     |
|                                                                                                                                     | By 2030, implement integrated water resources management at all levels, including through transboundary cooperation as appropriate                                                                                                                                                                                 |                                     |                                     |                                     | <input checked="" type="checkbox"/> |
|                                                                                                                                     | By 2020, protect and restore water-related ecosystems, including mountains, forests, wetlands, rivers, aquifers and lakes                                                                                                                                                                                          | <input checked="" type="checkbox"/> |                                     |                                     |                                     |
|                                                                                                                                     | By 2030, expand international cooperation and capacity-building support to developing countries in water- and sanitation-related activities and programmes, including water harvesting, desalination, water efficiency, wastewater treatment, recycling and reuse technologies                                     |                                     |                                     |                                     | <input checked="" type="checkbox"/> |
|                                                                                                                                     | Support and strengthen the participation of local communities in improving water and sanitation management                                                                                                                                                                                                         |                                     |                                     |                                     | <input checked="" type="checkbox"/> |
| 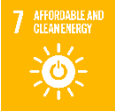 <b>7</b> AFFORDABLE AND CLEAN ENERGY             | By 2030, ensure universal access to affordable, reliable and modern energy services                                                                                                                                                                                                                                |                                     | <input checked="" type="checkbox"/> |                                     |                                     |
|                                                                                                                                     | By 2030, increase substantially the share of renewable energy in the global energy mix                                                                                                                                                                                                                             |                                     | <input checked="" type="checkbox"/> |                                     |                                     |
|                                                                                                                                     | By 2030, double the global rate of improvement in energy efficiency                                                                                                                                                                                                                                                |                                     | <input checked="" type="checkbox"/> |                                     |                                     |
|                                                                                                                                     | By 2030, enhance international cooperation to facilitate access to clean energy research and technology, including renewable energy, energy efficiency and advanced and cleaner fossil-fuel technology, and promote investment in energy infrastructure and clean energy technology                                |                                     | <input checked="" type="checkbox"/> |                                     |                                     |
|                                                                                                                                     | By 2030, expand infrastructure and upgrade technology for supplying modern and sustainable energy services for all in developing countries, in particular least developed countries, small island developing States and landlocked developing countries, in accordance with their respective programmes of support |                                     | <input checked="" type="checkbox"/> |                                     |                                     |
| 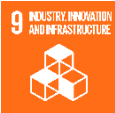 <b>9</b> INDUSTRY INNOVATION AND INFRASTRUCTURE | Develop quality, reliable, sustainable and resilient infrastructure, including regional and transborder infrastructure, to support economic development and human well-being, with a focus on affordable and equitable access for all                                                                              |                                     |                                     | <input checked="" type="checkbox"/> |                                     |

| UN SDG                                                                             | Target                                                                                                                                                                                                                                                                                                               | Farmers | Food processors                     | Food traders                        | Food consumers                      |
|------------------------------------------------------------------------------------|----------------------------------------------------------------------------------------------------------------------------------------------------------------------------------------------------------------------------------------------------------------------------------------------------------------------|---------|-------------------------------------|-------------------------------------|-------------------------------------|
| 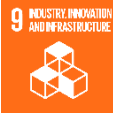  | Promote inclusive and sustainable industrialization and, by 2030, significantly raise industry's share of employment and gross domestic product, in line with national circumstances, and double its share in least developed countries                                                                              |         |                                     | <input checked="" type="checkbox"/> |                                     |
| 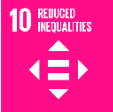  | Ensure equal opportunity and reduce inequalities of outcome, including by eliminating discriminatory laws, policies and practices and promoting appropriate legislation, policies and action in this regard                                                                                                          |         |                                     | <input checked="" type="checkbox"/> |                                     |
| 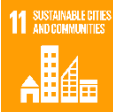  | By 2030, significantly reduce the number of deaths and the number of people affected and substantially decrease the direct economic losses relative to global gross domestic product caused by disasters, including water-related disasters, with a focus on protecting the poor and people in vulnerable situations |         |                                     | <input checked="" type="checkbox"/> |                                     |
| 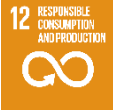 | Implement the 10-Year Framework of Programmes on Sustainable Consumption and Production Patterns, all countries taking action, with developed countries taking the lead, taking into account the development and capabilities of developing countries                                                                |         |                                     |                                     | <input checked="" type="checkbox"/> |
|                                                                                    | By 2030, achieve the sustainable management and efficient use of natural resources                                                                                                                                                                                                                                   |         | <input checked="" type="checkbox"/> |                                     |                                     |
|                                                                                    | By 2030, halve per capita global food waste at the retail and consumer levels and reduce food losses along production and supply chains, including post-harvest losses                                                                                                                                               |         |                                     | <input checked="" type="checkbox"/> |                                     |
|                                                                                    | By 2020, achieve the environmentally sound management of chemicals and all wastes throughout their life cycle, in accordance with agreed international frameworks, and significantly reduce their release to air, water and soil in order to minimize their adverse impacts on human health and the environment      |         | <input checked="" type="checkbox"/> |                                     |                                     |
|                                                                                    | Encourage companies, especially large and transnational companies, to adopt sustainable practices and to integrate sustainability information into their reporting cycle                                                                                                                                             |         | <input checked="" type="checkbox"/> |                                     |                                     |
|                                                                                    | Promote public procurement practices that are sustainable, in accordance with national policies and priorities                                                                                                                                                                                                       |         |                                     | <input checked="" type="checkbox"/> |                                     |
|                                                                                    | Support developing countries to strengthen their scientific and technological capacity to move towards more sustainable patterns of consumption and production                                                                                                                                                       |         | <input checked="" type="checkbox"/> |                                     |                                     |

| UN SDG                                                                              | Target                                                                                                                                                                                                                                                                                                                                                                                                                                                             | Farmers                             | Food processors                     | Food traders | Food consumers |
|-------------------------------------------------------------------------------------|--------------------------------------------------------------------------------------------------------------------------------------------------------------------------------------------------------------------------------------------------------------------------------------------------------------------------------------------------------------------------------------------------------------------------------------------------------------------|-------------------------------------|-------------------------------------|--------------|----------------|
| 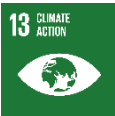   | Strengthen resilience and adaptive capacity to climate-related hazards and natural disasters in all countries                                                                                                                                                                                                                                                                                                                                                      | <input checked="" type="checkbox"/> |                                     |              |                |
|                                                                                     | Integrate climate change measures into national policies, strategies and planning                                                                                                                                                                                                                                                                                                                                                                                  |                                     | <input checked="" type="checkbox"/> |              |                |
|                                                                                     | Improve education, awareness-raising and human and institutional capacity on climate change mitigation, adaptation, impact reduction and early warning                                                                                                                                                                                                                                                                                                             | <input checked="" type="checkbox"/> |                                     |              |                |
| 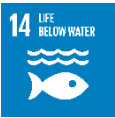   | By 2025, prevent and significantly reduce marine pollution of all kinds, in particular from land-based activities, including <u>marine debris</u> and nutrient pollution                                                                                                                                                                                                                                                                                           | <input checked="" type="checkbox"/> |                                     |              |                |
|                                                                                     | By 2020, effectively regulate harvesting and end overfishing, illegal, unreported and unregulated fishing and destructive fishing practices and implement science-based management plans, in order to restore fish stocks in the shortest time feasible, at least to levels that can produce maximum sustainable yield as determined by their biological characteristics                                                                                           | <input checked="" type="checkbox"/> |                                     |              |                |
|                                                                                     | By 2020, prohibit certain forms of fisheries subsidies which contribute to overcapacity and overfishing, eliminate subsidies that contribute to illegal, unreported and unregulated fishing and refrain from introducing new such subsidies, recognizing that appropriate and effective special and differential treatment for developing and least developed countries should be an integral part of the World Trade Organization fisheries subsidies negotiation | <input checked="" type="checkbox"/> |                                     |              |                |
|                                                                                     | Provide access for small-scale artisanal fishers to marine resources and markets                                                                                                                                                                                                                                                                                                                                                                                   | <input checked="" type="checkbox"/> |                                     |              |                |
| 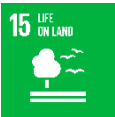 | By 2020, ensure the conservation, restoration and sustainable use of terrestrial and inland freshwater ecosystems and their services, in particular forests, wetlands, mountains and drylands, in line with obligations under international agreements                                                                                                                                                                                                             | <input checked="" type="checkbox"/> |                                     |              |                |
|                                                                                     | By 2030, combat desertification, restore degraded land and soil, including land affected by desertification, drought and floods, and strive to achieve a land degradation-neutral world                                                                                                                                                                                                                                                                            | <input checked="" type="checkbox"/> |                                     |              |                |
|                                                                                     | Take urgent and significant action to reduce the degradation of natural habitats, halt the loss of biodiversity and, by 2020, protect and prevent the extinction of threatened species                                                                                                                                                                                                                                                                             | <input checked="" type="checkbox"/> |                                     |              |                |

| UN SDG                                                                            | Target                                                                                                                                                                                                                                                | Farmers                             | Food processors                     | Food traders                        | Food consumers |
|-----------------------------------------------------------------------------------|-------------------------------------------------------------------------------------------------------------------------------------------------------------------------------------------------------------------------------------------------------|-------------------------------------|-------------------------------------|-------------------------------------|----------------|
| 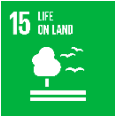 | By 2020, introduce measures to prevent the introduction and significantly reduce the impact of invasive alien species on land and water ecosystems and control or eradicate the priority species                                                      | <input checked="" type="checkbox"/> |                                     |                                     |                |
| 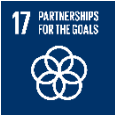 | Promote the development, transfer, dissemination and diffusion of environmentally sound technologies to developing countries on favourable terms, including on concessional and preferential terms, as mutually agreed                                |                                     | <input checked="" type="checkbox"/> |                                     |                |
|                                                                                   | Fully operationalize the technology bank and science, technology and innovation capacity-building mechanism for least developed countries by 2017 and enhance the use of enabling technology, in particular information and communications technology |                                     | <input checked="" type="checkbox"/> |                                     |                |
|                                                                                   | Promote a universal, rules-based, open, non-discriminatory and equitable multilateral trading system under the World Trade Organization, including through the conclusion of negotiations under its Doha Development Agenda                           |                                     |                                     | <input checked="" type="checkbox"/> |                |
|                                                                                   | Significantly increase the exports of developing countries, in particular with a view to doubling the least developed countries' share of global exports by 2020                                                                                      |                                     |                                     | <input checked="" type="checkbox"/> |                |
|                                                                                   | Respect each country's policy space and leadership to establish and implement policies for poverty eradication and sustainable development                                                                                                            | <input checked="" type="checkbox"/> |                                     |                                     |                |
|                                                                                   | Enhance the Global Partnership for Sustainable Development, complemented by multi-stakeholder partnerships that mobilize and share knowledge, expertise, technology and financial resources, to support                                               | <input checked="" type="checkbox"/> |                                     |                                     |                |
